# Supplementary material for: Quality of care before and after initial certification at a German certified hereditary breast and ovarian cancer center
Source: Research Square preprint supplement (doi:10.21203/rs.3.rs-7761592/v1), 2025-10-17
Supplement: Supplementary file 1 [file 3e8a9dc85dadd34cc6a2b069.docx]

**Supplements**

| Breast and ovarian cancer genes | 2018-2020 | 2021-2023 |
| --- | --- | --- |
| ATM | 35 | 56 |
| BARD1 | 6 | 14 |
| BRCA1 | 97 | 126 |
| BRCA2 | 85 | 117 |
| BRIP1 | 8 | 18 |
| CDH1 | 8 | 13 |
| CHEK2 | 44 | 79 |
| EPCAM |  | 1 |
| MLH1 | 4 | 6 |
| MRE11A | 3 |  |
| MSH2 | 7 | 9 |
| MSH6 | 7 | 22 |
| MUTYH | 1 |  |
| NBN | 4 | 2 |
| NF1 |  | 1 |
| NTHL1 |  | 2 |
| PALB2 | 20 | 32 |
| PMS2 | 7 | 9 |
| PTEN |  | 2 |
| RAD51C | 3 | 6 |
| RAD51D | 6 | 1 |
| RET |  | 1 |
| SMARCA4 | 1 | 3 |
| STK11 | 5 | 3 |
| TP53 | 4 | 5 |

Supp Tab 1. Breast and ovarian cancer genetic variants of lWIST Exome 2.0 Enrichment Technologie (lWIST Bioscience) between 2018-2023.
